# Supplementary material
Source: publisher figshare collection journal article supplement (https://gsapubs.figshare.com/articles/dataset/_/21520938)
Supplement: Supplementary file 1 [file 1]

## Sheet: Contents
Calculation of the environmental dose rate
S.1	DRAC Input
S.2	DRAC Output
S.3	Thin section analysis results
S.4	Environmental Dose Rate Summary
Raw luminescence data
S.5-72	KRG16-01	IRSL50, IRSL100, IRSL150, IRSL225
	KRG16-03	IRSL50, IRSL100, IRSL150, IRSL225
	KRG16-05*	IRSL50, IRSL100, IRSL150, IRSL225
	KRG16-06*	IRSL50, IRSL100, IRSL150, IRSL225
	KRG16-07	IRSL50, IRSL100, IRSL150, IRSL225
	KRG16-08	IRSL50, IRSL100, IRSL150, IRSL225
	KRG16-10	IRSL50, IRSL100, IRSL150, IRSL225
	KRG16-13*	IRSL50, IRSL100, IRSL150, IRSL225
	KRG16-100	IRSL50, IRSL100, IRSL150, IRSL225
	KRG16-101*	IRSL50, IRSL100, IRSL150, IRSL225
	KRG16-102	IRSL50, IRSL100, IRSL150, IRSL225
	KRG16-103	IRSL50, IRSL100, IRSL150, IRSL225
	KRG16-104*	IRSL50, IRSL100, IRSL150, IRSL225
	KRG16-111*	IRSL50, IRSL100, IRSL150, IRSL225
	KRG16-112	IRSL50, IRSL100, IRSL150, IRSL225
	KRG16-113	IRSL50, IRSL100, IRSL150, IRSL225
	KRG16-115	IRSL50, IRSL100, IRSL150, IRSL225
*Data previously published in King, G.E., Tsukamoto, S., Herman, F., Biswas, R.H., Sueoka, S. and Tagami, T., 2020. Electron spin resonance (ESR) thermochronometry of the Hida range of the Japanese Alps: validation and future potential. Geochronology, 2(1), pp.1-15.
King, G.E., et al., 2023, Eustatic change modulates exhumation in the Japanese Alps: Geology, https://doi.org/10.1130/G50599.1

## Sheet: S.1 DRAC Input
DRAC v.1.2 Inputs
Full details of the inputs required for a DRAC dose rate calculation and the calculation process can be found in the paper and the DRAC website (www.aber.ac.uk/alrl/drac).
Please cite all uses of DRAC, including the version number, as Durcan, J.A., King, G.E., and Duller, G.A.T., 2015. DRAC: Dose rate and age calculator for trapped charge dating. Quaternary Geochronology, 28, 54-61. Corresponding authors: Julie Durcan (julie.durcan@ouce.ox.ac.uk) and Georgina King (georgina.king@uni-koeln.de).
To calculate dose rates using DRAC, the data table below (excluding headers) can be copied and pasted into the calculator box on the DRAC website (www.aber.ac.uk/alrl/DRAC). Once 'calculate' has been clicked, DRAC will generate an output file, which can be saved by the user.
TI:1	TI:2	TI:3	TI:4	TI:5	TI:6	TI:7	TI:8	TI:9	TI:10	TI:11	TI:12	TI:13	TI:14	TI:15	TI:16	TI:17	TI:18	TI:19	TI:20	TI:21	TI:22	TI:23	TI:24	TI:25	TI:26	TI:27	TI:28	TI:29	TI:30	TI:31	TI:32	TI:33	TI:34	TI:35	TI:36	TI:37	TI:38	TI:39	TI:40	TI:41	TI:42	TI:43	TI:44	TI:45	TI:46	TI:47	TI:48	TI:49	TI:50
Project ID	Sample ID	Mineral	Conversion factors	ExternalU (ppm)	errExternal U (ppm)	External Th (ppm)	errExternal Th (ppm)	External K (%)	errExternal K (%)	External Rb (ppm)	errExternal Rb (ppm)	Calculate external Rb from K conc?	Internal U (ppm)	errInternal U (ppm)	Internal Th (ppm)	errInternal Th (ppm)	Internal K (%)	errInternal K (%)	Internal Rb (ppm)	errInternal Rb (ppm)	Calculate internal Rb from K conc?	User external alphadoserate (Gy.ka-1)	errUser external alphadoserate (Gy.ka-1)	User external betadoserate (Gy.ka-1)	errUser external betadoserate (Gy.ka-1)	User external gamma doserate (Gy.ka-1)	errUser external gammadoserate (Gy.ka-1)	User internal doserate (Gy.ka-1)	errUser internal doserate (Gy.ka-1)	Scale gammadoserate at shallow depths?	Grain size min (microns)	Grain size max (microns)	alpha-Grain size attenuation	beta-Grain size attenuation	Etch depth min (microns)	Etch depth max (microns)	beta-Etch depth attenuation factor	a-value	erra-value	Water content ((wet weight - dry weight)/dry weight) %	errWater content %	Depth (m)	errDepth (m)	Overburden density (g cm-3)	errOverburden density (g cm-3)	Latitude (decimal degrees)	Longitude (decimal degrees)	Altitude (m)	User cosmicdoserate (Gy.ka-1)
KRG16-01	Feldspar	F	Guerinetal2011	2.5	0.025	13.2	0.528	3.15438	0.0315438	139	1.39	N	X	X	X	X	12.5	0.5	X	X	Y	X	X	X	X	X	X	X	X	N	180	720	Brennanetal1991	Guerinetal2012-F	0	0	Bell1979	0.15	0.05	2	2	100	0.05	2.6	0.1	36.6528	137.675	1140	X
KRG16-03	Feldspar	F	Guerinetal2011	2.4	0.024	11.6	0.464	3.15438	0.0315438	122	1.22	N	X	X	X	X	12.5	0.5	X	X	Y	X	X	X	X	X	X	X	X	N	180	1000	Brennanetal1991	Guerinetal2012-F	0	0	Bell1979	0.15	0.05	2	2	100	0.05	2.6	0.1	36.6517	137.684	965	X
KRG16-04	Feldspar	F	Guerinetal2011	1.7	0.017	6.7	0.268	1.55229	0.0155229	68	0.68	N	X	X	X	X	12.5	0.5	X	X	Y	X	X	X	X	X	X	X	X	N	180	1000	Brennanetal1991	Guerinetal2012-F	0	0	Bell1979	0.15	0.05	2	2	100	0.05	2.6	0.1	36.6459	137.683	903	X
KRG16-05	Feldspar	F	Guerinetal2011	6.7	0.067	19.9	0.796	4.05919	0.0405919	174	1.74	N	X	X	X	X	12.5	0.5	X	X	Y	X	X	X	X	X	X	X	X	N	180	750	Brennanetal1991	Guerinetal2012-F	0	0	Bell1979	0.15	0.05	2	2	100	0.05	2.6	0.1	36.6349	137.647	2134.17	X
KRG16-06	Feldspar	F	Guerinetal2011	3.1	0.031	9.4	0.376	3.12948	0.0312948	108	1.08	N	X	X	X	X	12.5	0.5	X	X	Y	X	X	X	X	X	X	X	X	N	750	1000	Brennanetal1991	Guerinetal2012-F	0	0	Bell1979	0.15	0.05	2	2	100	0.05	2.6	0.1	36.6402	137.651	1883.78	X
KRG16-07	Feldspar	F	Guerinetal2011	3.4	0.034	12.7	0.508	2.92195	0.0292195	105	1.05	N	X	X	X	X	12.5	0.5	X	X	Y	X	X	X	X	X	X	X	X	N	180	1000	Brennanetal1991	Guerinetal2012-F	0	0	Bell1979	0.15	0.05	2	2	100	0.05	2.6	0.1	36.6443	137.654	1694.68	X
KRG16-08	Feldspar	F	Guerinetal2011	2.4	0.024	11.4	0.456	2.99666	0.0299666	115	1.15	N	X	X	X	X	12.5	0.5	X	X	Y	X	X	X	X	X	X	X	X	N	180	1000	Brennanetal1991	Guerinetal2012-F	0	0	Bell1979	0.15	0.05	2	2	100	0.05	2.6	0.1	36.6407	137.692	1337	X
KRG16-10	Feldspar	F	Guerinetal2011	2.8	0.028	11.7	0.468	3.16268	0.0316268	114	1.14	N	X	X	X	X	12.5	0.5	X	X	Y	X	X	X	X	X	X	X	X	N	180	700	Brennanetal1991	Guerinetal2012-F	0	0	Bell1979	0.15	0.05	2	2	100	0.05	2.6	0.1	36.652	137.686	795	X
KRG16-13	Feldspar	F	Guerinetal2011	4.1	0.041	14.9	0.596	3.10457	0.0310457	135	1.35	N	X	X	X	X	12.5	0.5	X	X	Y	X	X	X	X	X	X	X	X	N	180	400	Brennanetal1991	Guerinetal2012-F	0	0	Bell1979	0.15	0.05	2	2	100	0.05	2.6	0.1	36.6378	137.65	1992.05	X
KRG16-100	Feldspar	F	Guerinetal2011	6.2	0.062	24.5	0.98	3.71055	0.0371055	134	1.34	N	X	X	X	X	12.5	0.5	X	X	Y	X	X	X	X	X	X	X	X	N	180	900	Brennanetal1991	Guerinetal2012-F	0	0	Bell1979	0.15	0.05	2	2	100	0.05	2.6	0.1	36.6852	137.76	2632.4	X
KRG16-101	Feldspar	F	Guerinetal2011	3.1	0.031	14	0.56	2.85554	0.0285554	106	1.06	N	X	X	X	X	12.5	0.5	X	X	Y	X	X	X	X	X	X	X	X	N	250	1000	Brennanetal1991	Guerinetal2012-F	0	0	Bell1979	0.15	0.05	2	2	100	0.05	2.6	0.1	36.6469	137.662	1605.16	X
KRG16-102	Feldspar	F	Guerinetal2011	2.6	0.026	11.3	0.452	3.27059	0.0327059	140	1.4	N	X	X	X	X	12.5	0.5	X	X	Y	X	X	X	X	X	X	X	X	N	180	600	Brennanetal1991	Guerinetal2012-F	0	0	Bell1979	0.15	0.05	2	2	100	0.05	2.6	0.1	36.6492	137.669	1437.96	X
KRG16-103	Feldspar	F	Guerinetal2011	2.5	0.025	11.8	0.472	3.37851	0.0337851	135	1.35	N	X	X	X	X	12.5	0.5	X	X	Y	X	X	X	X	X	X	X	X	N	180	400	Brennanetal1991	Guerinetal2012-F	0	0	Bell1979	0.15	0.05	2	2	100	0.05	2.6	0.1	36.6491	137.672	1325.96	X
KRG16-104	Feldspar	F	Guerinetal2011	3.1	0.031	12.3	0.492	3.21249	0.0321249	131	1.31	N	X	X	X	X	12.5	0.5	X	X	Y	X	X	X	X	X	X	X	X	N	180	600	Brennanetal1991	Guerinetal2012-F	0	0	Bell1979	0.15	0.05	2	2	100	0.05	2.6	0.1	36.6484	137.675	1193.86	X
KRG16-111	Feldspar	F	Guerinetal2011	3.3	0.033	13.9	0.556	3.42831	0.0342831	135	1.35	N	X	X	X	X	12.5	0.5	X	X	Y	X	X	X	X	X	X	X	X	N	180	1000	Brennanetal1991	Guerinetal2012-F	0	0	Bell1979	0.15	0.05	2	2	100	0.05	2.6	0.1	36	137	0	X
KRG16-112	Feldspar	F	Guerinetal2011	4.1	0.041	13.2	0.528	3.3619	0.033619	165	1.65	N	X	X	X	X	12.5	0.5	X	X	Y	X	X	X	X	X	X	X	X	N	180	1000	Brennanetal1991	Guerinetal2012-F	0	0	Bell1979	0.15	0.05	2	2	100	0.05	2.6	0.1	36	137	0	X
KRG16-113	Feldspar	F	Guerinetal2011	5.6	0.056	13.3	0.532	3.07137	0.0307137	152	1.52	N	X	X	X	X	12.5	0.5	X	X	Y	X	X	X	X	X	X	X	X	N	180	1000	Brennanetal1991	Guerinetal2012-F	0	0	Bell1979	0.15	0.05	2	2	100	0.05	2.6	0.1	36	137	0	X
KRG16-115	Feldspar	F	Guerinetal2011	2.6	0.026	11	0.44	3.09627	0.0309627	120	1.2	N	X	X	X	X	12.5	0.5	X	X	Y	X	X	X	X	X	X	X	X	N	180	760	Brennanetal1991	Guerinetal2012-F	0	0	Bell1979	0.15	0.05	2	2	100	0.05	2.6	0.1	36.6548	137.682	979	X
KRG16-05	Quartz	Q	Guerinetal2011	6.7	0.067	19.9	0.796	4.05919	0.0405919	174	1.74	N	X	X	X	X	X	X	X	X	N	X	X	X	X	X	X	X	X	N	180	750	Brennanetal1991	Guerinetal2012-Q	10	2	Bell1979	0.04	0.005	2	2	100	0.05	2.6	0.1	36.6349	137.647	2134.17	X
KRG16-06	Quartz	Q	Guerinetal2011	3.1	0.126438	9.4	0.0954289	3.12948	0.032671	108	1.11153	N	X	X	X	X	X	X	X	X	N	X	X	X	X	X	X	X	X	N	750	1000	Brennanetal1991	Guerinetal2012-Q	10	2	Bell1979	0.04	0.005	2	2	100	0.05	2.6	0.1	36.6402	137.651	1883.78	X
KRG16-101	Quartz	Q	Guerinetal2011	3.1	0.126438	14	0.56	2.85554	0.0298112	106	1.06	N	X	X	X	X	X	X	X	X	N	X	X	X	X	X	X	X	X	N	250	1000	Brennanetal1991	Guerinetal2012-Q	10	2	Bell1979	0.04	0.005	2	2	100	0.05	2.6	0.1	36.6469	137.662	1605.16	X
KRG16-104	Quartz	Q	Guerinetal2011	3.1	0.126438	12.3	0.12487	3.21249	0.0335376	131	1.34824	N	X	X	X	X	X	X	X	X	N	X	X	X	X	X	X	X	X	N	180	600	Brennanetal1991	Guerinetal2012-Q	10	2	Bell1979	0.04	0.005	2	2	100	0.05	2.6	0.1	36.6484	137.675	1193.86	X
KRG16-111	Quartz	Q	Guerinetal2011	3.3	0.134595	13.9	0.141113	3.42831	0.0357908	135	1.38941	N	X	X	X	X	X	X	X	X	N	X	X	X	X	X	X	X	X	N	180	1000	Brennanetal1991	Guerinetal2012-Q	10	2	Bell1979	0.04	0.005	2	2	100	0.05	2.6	0.1	36	137	0	X
KRG16-112	Quartz	Q	Guerinetal2011	4.1	0.041	13.2	0.528	3.3619	0.033619	165	1.65	N	X	X	X	X	X	X	X	X	N	X	X	X	X	X	X	X	X	N	180	1000	Brennanetal1991	Guerinetal2012-Q	10	2	Bell1979	0.04	0.005	2	2	100	0.05	2.6	0.1	36	137	0	X
[truncated: 3 more columns]

## Sheet: S.2 DRAC Output
DRAC 1.2 output
Full details of the inputs required for a DRAC dose rate calculation and the calculation process can be found in the paper and the DRAC website (www.aber.ac.uk/alrl/drac).
Please cite all uses of DRAC, including the version number, as Durcan, J.A., King, G.E., and Duller, G.A.T., 2015. DRAC: Dose rate and age calculator for trapped charge dating. Quaternary Geochronology, 28, 54-61. Corresponding authors: Julie Durcan (julie.durcan@ouce.ox.ac.uk) and Georgina King (georgina.king@uni-koeln.de).
DRAC Highlights																													DRAC Inputs
TI:1	TI:2	TI:3	TO:FQ	TO:FR	TO:FS	TO:FT	TO:FU	TO:FV	TO:FW	TO:FX	TO:FY	TO:FZ	TO:GG	TO:GH	TO:GI	TO:GJ	TO:GK	TO:GL	TO:GM	TO:GN			TI:52	TI:53	TO:GO	TO:GP			TI:1	TI:2	TI:3	TI:4	TI:5	TI:6	TI:7	TI:8	TI:9	TI:10	TI:11	TI:12	TI:13	TI:14	TI:15	TI:16	TI:17	TI:18	TI:19	TI:20	TI:21
Project ID	Sample ID	Mineral	Water corrected alphadoserate	Water corrected erralphadoserate	Water corrected betadoserate	Water corrected errbetadoserate	Water corrected gammadoserate (Gy.ka-1)	Water corrected errgammadoserate (Gy.ka-1)	Internal Dry alphadoserate (Gy.ka-1)	Internal Dry erralphadoserate (Gy.ka-1)	Internal Dry betadoserate (Gy.ka-1)	Internal Dry errbetadoserate (Gy.ka-1)	Cosmicdoserate (Gy.ka-1)	errCosmicdoserate (Gy.ka-1)	External doserate (Gy.ka-1)	External errdoserate (Gy.ka-1)	Internal doserate (Gy.ka-1)	Internal errdoserate (Gy.ka-1)	Environmental Dose Rate (Gy.ka-1)	errEnvironmental Dose Rate (Gy.ka-1)	Ddot - Cosmic	Ddot Err - Cosmic	De (Gy)	errDe (Gy)	Age (ka)	errAge (ka)			Project ID	Sample ID	Mineral	Conversion factors	ExternalU (ppm)	errExternal U (ppm)	External Th (ppm)	errExternal Th (ppm)	External K (%)	errExternal K (%)	External Rb (ppm)	errExternal Rb (ppm)	Calculate external Rb from K conc?	Internal U (ppm)	errInternal U (ppm)	Internal Th (ppm)	errInternal Th (ppm)	Internal K (%)	errInternal K (%)	Rb (ppm)	errRb (ppm)
KRG16-01	Feldspar	F	0.143	0.072	2.591	0.262	1.658	0.048	0	0	1.783	1.011	0.001	0	4.394	0.276	1.783	1.011	6.177	1.048	6.176	1.048	20	0.2	3.238	0.55			KRG16-01	Feldspar	F	Guerinetal2011	2.5	0.03	13.2	0.53	3.15	0.03	139	1.39	N	X	X	X	X	12.5	0.5	X	X
KRG16-03	Feldspar	F	0.126	0.068	2.41	0.374	1.572	0.044	0	0	2.253	1.479	0.001	0	4.109	0.382	2.253	1.479	6.362	1.528	6.361	1.528	20	0.2	3.143	0.756			KRG16-03	Feldspar	F	Guerinetal2011	2.4	0.02	11.6	0.46	3.15	0.03	122	1.22	N	X	X	X	X	12.5	0.5	X	X
KRG16-04	Feldspar	F	0.08	0.042	1.26	0.186	0.877	0.025	0	0	2.253	1.479	0.001	0	2.217	0.192	2.253	1.479	4.47	1.492	4.469	1.492	20	0.2	4.474	1.494			KRG16-04	Feldspar	F	Guerinetal2011	1.7	0.02	6.7	0.27	1.55	0.02	68	0.68	N	X	X	X	X	12.5	0.5	X	X
KRG16-05	Feldspar	F	0.281	0.141	3.757	0.367	2.652	0.074	0	0	1.836	1.064	0.001	0	6.691	0.4	1.836	1.064	8.526	1.137	8.525	1.137	20	0.2	2.346	0.314			KRG16-05	Feldspar	F	Guerinetal2011	6.7	0.07	19.9	0.8	4.06	0.04	174	1.74	N	X	X	X	X	12.5	0.5	X	X
KRG16-06	Feldspar	F	0.046	0.011	2.098	0.117	1.541	0.042	0	0	3.336	0.435	0.001	0	3.686	0.125	3.336	0.435	7.022	0.453	7.021	0.453	20	0.2	2.848	0.186			KRG16-06	Feldspar	F	Guerinetal2011	3.1	0.03	9.4	0.38	3.13	0.03	108	1.08	N	X	X	X	X	12.5	0.5	X	X
KRG16-07	Feldspar	F	0.155	0.082	2.393	0.351	1.677	0.047	0	0	2.253	1.479	0.001	0	4.227	0.364	2.253	1.479	6.48	1.523	6.479	1.523	20	0.2	3.087	0.726			KRG16-07	Feldspar	F	Guerinetal2011	3.4	0.03	12.7	0.51	2.92	0.03	105	1.05	N	X	X	X	X	12.5	0.5	X	X
KRG16-08	Feldspar	F	0.125	0.067	2.314	0.356	1.526	0.043	0	0	2.253	1.479	0.001	0	3.966	0.365	2.253	1.479	6.219	1.524	6.218	1.524	20	0.2	3.216	0.789			KRG16-08	Feldspar	F	Guerinetal2011	2.4	0.02	11.4	0.46	3	0.03	115	1.15	N	X	X	X	X	12.5	0.5	X	X
KRG16-10	Feldspar	F	0.141	0.069	2.611	0.255	1.623	0.046	0	0	1.748	0.976	0.001	0	4.376	0.268	1.748	0.976	6.123	1.012	6.122	1.012	20	0.2	3.266	0.541			KRG16-10	Feldspar	F	Guerinetal2011	2.8	0.03	11.7	0.47	3.16	0.03	114	1.14	N	X	X	X	X	12.5	0.5	X	X
KRG16-13	Feldspar	F	0.222	0.08	2.961	0.133	1.9	0.054	0	0	1.187	0.421	0.001	0	5.084	0.164	1.187	0.421	6.271	0.452	6.27	0.452	20	0.2	3.189	0.232			KRG16-13	Feldspar	F	Guerinetal2011	4.1	0.04	14.9	0.6	3.1	0.03	135	1.35	N	X	X	X	X	12.5	0.5	X	X
KRG16-100	Feldspar	F	0.292	0.154	3.46	0.412	2.727	0.079	0	0	2.09	1.316	0.001	0	6.481	0.447	2.09	1.316	8.571	1.39	8.57	1.39	20	0.2	2.334	0.379			KRG16-100	Feldspar	F	Guerinetal2011	6.2	0.06	24.5	0.98	3.71	0.04	134	1.34	N	X	X	X	X	12.5	0.5	X	X
KRG16-101	Feldspar	F	0.12	0.057	2.304	0.313	1.69	0.049	0	0	2.395	1.345	0.001	0	4.115	0.322	2.395	1.345	6.51	1.383	6.509	1.383	20	0.2	3.072	0.653			KRG16-101	Feldspar	F	Guerinetal2011	3.1	0.03	14	0.56	2.86	0.03	106	1.06	N	X	X	X	X	12.5	0.5	X	X
KRG16-102	Feldspar	F	0.138	0.064	2.71	0.218	1.609	0.045	0	0	1.566	0.795	0.001	0	4.459	0.232	1.566	0.795	6.024	0.829	6.023	0.829	20	0.2	3.32	0.458			KRG16-102	Feldspar	F	Guerinetal2011	2.6	0.03	11.3	0.45	3.27	0.03	140	1.4	N	X	X	X	X	12.5	0.5	X	X
KRG16-103	Feldspar	F	0.156	0.057	2.904	0.137	1.649	0.046	0	0	1.187	0.421	0.001	0	4.709	0.156	1.187	0.421	5.896	0.449	5.895	0.449	20	0.2	3.392	0.261			KRG16-103	Feldspar	F	Guerinetal2011	2.5	0.03	11.8	0.47	3.38	0.03	135	1.35	N	X	X	X	X	12.5	0.5	X	X
KRG16-104	Feldspar	F	0.156	0.072	2.746	0.216	1.696	0.047	0	0	1.566	0.795	0.001	0	4.599	0.233	1.566	0.795	6.165	0.829	6.164	0.829	20	0.2	3.244	0.437			KRG16-104	Feldspar	F	Guerinetal2011	3.1	0.03	12.3	0.49	3.21	0.03	131	1.31	N	X	X	X	X	12.5	0.5	X	X
KRG16-111	Feldspar	F	0.161	0.086	2.72	0.409	1.846	0.052	0	0	2.253	1.479	0.001	0	4.728	0.421	2.253	1.479	6.981	1.538	6.98	1.538	20	0.2	2.865	0.632			KRG16-111	Feldspar	F	Guerinetal2011	3.3	0.03	13.9	0.56	3.43	0.03	135	1.35	N	X	X	X	X	12.5	0.5	X	X
KRG16-112	Feldspar	F	0.174	0.092	2.751	0.404	1.884	0.052	0	0	2.253	1.479	0.001	0	4.81	0.417	2.253	1.479	7.063	1.537	7.062	1.537	20	0.2	2.832	0.617			KRG16-112	Feldspar	F	Guerinetal2011	4.1	0.04	13.2	0.53	3.36	0.03	165	1.65	N	X	X	X	X	12.5	0.5	X	X
KRG16-113	Feldspar	F	0.209	0.111	2.732	0.378	1.982	0.054	0	0	2.253	1.479	0.001	0	4.923	0.398	2.253	1.479	7.176	1.532	7.175	1.532	20	0.2	2.787	0.596			KRG16-113	Feldspar	F	Guerinetal2011	5.6	0.06	13.3	0.53	3.07	0.03	152	1.52	N	X	X	X	X	12.5	0.5	X	X
KRG16-115	Feldspar	F	0.13	0.066	2.505	0.274	1.554	0.044	0	0	1.853	1.081	0.001	0	4.19	0.285	1.853	1.081	6.043	1.118	6.042	1.118	20	0.2	3.31	0.613			KRG16-115	Feldspar	F	Guerinetal2011	2.6	0.03	11	0.44	3.1	0.03	120	1.2	N	X	X	X	X	12.5	0.5	X	X
KRG16-05	Quartz	Q	0.044	0.024	3.678	0.375	2.652	0.074	0	0	0	0	0.001	0	6.375	0.383	0	0	6.375	0.383	6.374	0.383	20	0.2	3.137	0.191			KRG16-05	Quartz	Q	Guerinetal2011	6.7	0.07	19.9	0.8	4.06	0.04	174	1.74	N	X	X	X	X	X	X	X	X
KRG16-06	Quartz	Q	0.007	0.002	2.047	0.12	1.541	0.041	0	0	0	0	0.001	0	3.596	0.127	0	0	3.596	0.127	3.595	0.127	20	0.2	5.562	0.204			KRG16-06	Quartz	Q	Guerinetal2011	3.1	0.13	9.4	0.1	3.13	0.03	108	1.11	N	X	X	X	X	X	X	X	X
KRG16-101	Quartz	Q	0.019	0.01	2.255	0.322	1.69	0.044	0	0	0	0	0.001	0	3.966	0.325	0	0	3.966	0.325	3.965	0.325	20	0.2	5.043	0.416			KRG16-101	Quartz	Q	Guerinetal2011	3.1	0.13	14	0.14	2.86	0.03	106	1.09	N	X	X	X	X	X	X	X	X
KRG16-104	Quartz	Q	0.025	0.012	2.701	0.222	1.696	0.044	0	0	0	0	0.001	0	4.422	0.226	0	0	4.422	0.226	4.421	0.226	20	0.2	4.522	0.236			KRG16-104	Quartz	Q	Guerinetal2011	3.1	0.13	12.3	0.12	3.21	0.03	131	1.35	N	X	X	X	X	X	X	X	X
KRG16-111	Quartz	Q	0.025	0.014	2.667	0.421	1.846	0.048	0	0	0	0	0.001	0	4.54	0.424	0	0	4.54	0.424	4.539	0.424	20	0.2	4.405	0.414			KRG16-111	Quartz	Q	Guerinetal2011	3.3	0.13	13.9	0.14	3.43	0.04	135	1.39	N	X	X	X	X	X	X	X	X
KRG16-112	Quartz	Q	0.027	0.015	2.695	0.414	1.884	0.052	0	0	0	0	0.001	0	4.607	0.418	0	0	4.607	0.418	4.606	0.418	20	0.2	4.341	0.396			KRG16-112	Quartz	Q	Guerinetal2011	4.1	0.04	13.2	0.53	3.36	0.03	165	1.65	N	X	X	X	X	X	X	X	X
[truncated: 230 more columns]

## Sheet: S.3 Thin Section Analysis
Resolution of Image for thin section analysis
	Image type used	mm/pixel	Mode	Mean	Min (est)	Max (est)
Project ID
KRG16-01	Polarised	0.0044843	300	650	180	720
KRG16-03	Polarised	0.0044843	250	1150	180	1000
KRG16-04	Polarised	0.0044843	360	1100	180	1000
KRG16-05	Polarised	0.00451467	328	1000	180	750
KRG16-06	Polarised	0.00448542	1080	2000	750	1000
KRG16-07	Polarised	0.00448542	270	1500	180	1000
KRG16-08	Polarised	0.0044843	680	1700	180	1000
KRG16-10	Polarised	0.0044843	300	1000	180	700
KRG16-13	Polarised	0.00448542	160	500	180	400
KRG16-100	Polarised	0.0044843	360	1000	180	900
KRG16-101	Polarised	0.0044843	523	16000	250	1000
KRG16-102	Polarised	0.0044843	264	612	180	600
KRG16-103	Polarised	0.00448542	180	460	180	400
KRG16-104	Polarised	0.00448542	260	610	180	600
KRG16-111	Polarised	0.00448431	280	1340	180	1000
KRG16-112	Polarised	0.00448431	800	1650	180	1000
KRG16-113	Polarised	0.00448542	900	1850	180	1000
KRG16-115	Polarised	0.00448431	384	1195	180	760

## Sheet: S.4 Environmental Dose Rate Sum
Sample	U (ppm)		Th (ppm)		K (%)		Rb (ppm)		Grain size range		Feldspar Ddot		Quartz Ddot
KRG16-01	2.5	0.025	13.2	0.528	3.15438	0.0315438	139	1.39	180	720	6.176	1.048
KRG16-03	2.4	0.024	11.6	0.464	3.15438	0.0315438	122	1.22	180	1000	6.361	1.528
KRG16-04	1.7	0.017	6.7	0.268	1.55229	0.0155229	68	0.68	180	1000	4.469	1.492
KRG16-05	6.7	0.067	19.9	0.796	4.05919	0.0405919	174	1.74	180	750	8.525	1.137	6.374	0.383
KRG16-06	3.1	0.031	9.4	0.376	3.12948	0.0312948	108	1.08	750	1000	7.021	0.453	3.595	0.127
KRG16-07	3.4	0.034	12.7	0.508	2.92195	0.0292195	105	1.05	180	1000	6.479	1.523
KRG16-08	2.4	0.024	11.4	0.456	2.99666	0.0299666	115	1.15	180	1000	6.218	1.524
KRG16-10	2.8	0.028	11.7	0.468	3.16268	0.0316268	114	1.14	180	700	6.122	1.012
KRG16-13	4.1	0.041	14.9	0.596	3.10457	0.0310457	135	1.35	180	400	6.27	0.452
KRG16-100	6.2	0.062	24.5	0.98	3.71055	0.0371055	134	1.34	180	900	8.57	1.39
KRG16-101	3.1	0.031	14	0.56	2.85554	0.0285554	106	1.06	250	1000	6.509	1.383	3.965	0.325
KRG16-102	2.6	0.026	11.3	0.452	3.27059	0.0327059	140	1.4	180	600	6.023	0.829
KRG16-103	2.5	0.025	11.8	0.472	3.37851	0.0337851	135	1.35	180	400	5.895	0.449
KRG16-104	3.1	0.031	12.3	0.492	3.21249	0.0321249	131	1.31	180	600	6.164	0.829	4.421	0.226
KRG16-111	3.3	0.033	13.9	0.556	3.42831	0.0342831	135	1.35	180	1000	6.98	1.538	4.539	0.424
KRG16-112	4.1	0.041	13.2	0.528	3.3619	0.033619	165	1.65	180	1000	7.062	1.537	4.606	0.418
KRG16-113	5.6	0.056	13.3	0.532	3.07137	0.0307137	152	1.52	180	1000	7.175	1.532
KRG16-115	2.6	0.026	11	0.44	3.09627	0.0309627	120	1.2	180	760	6.042	1.118

## Sheet: KRG01 IR50
Sample KRG01
Natural T (°C)
Natural Ḋ (Gy/ka)			6.176	1.048		Zhe	0.4	0.12		ZFT	0.74	0.27
Lab calibration:
T (°C)	15	t (ks)	Nat	0	0.25	0.5	1.5	3	6	12	24	48	0	0.25
Ḋ (Gy/s)	0.105	Lx/Tx	0.791261	0.000896149	0.332256	0.58948	1.27039	1.94664	2.75845	3.64501	4.23755	4.56656	0.0064475	0.322382
T (°C)	15	t (ks)	Nat	0	0.25	0.5	1.5	3	6	12	24	48	0	0.25
Ḋ (Gy/s)	0.105	Lx/Tx	1.03188	0.00164967	0.268398	0.521113	1.31005	2.18785	3.37373	4.62216	5.60059	6.12774	0.00840964	0.28531
T (°C)	15	t (ks)	Nat	0	0.25	0.5	1.5	3	6	12	24	48	0	0.25
Ḋ (Gy/s)	0.105	Lx/Tx	0.806191	0.001573	0.262959	0.504088	1.32707	2.18178	3.3175	4.47698	5.50232	5.92661	0.00745377	0.28043
T (°C)	170	t (ks)	0	0.01	0.02	0.04	0.08	0.16	0.32	0.64	1.28	2.56	5.12	10.24
Ḋ (Gy/s)	0	Lx/Tx	0.969766	0.958857	0.953245	0.961227	0.948325	0.945119	0.920278	0.900976	0.873353	0.835459	0.793832	0.736712
T (°C)	190	t (ks)	0	0.01	0.02	0.04	0.08	0.16	0.32	0.64	1.28	2.56	5.12	10.24
Ḋ (Gy/s)	0	Lx/Tx	0.958032	0.945077	0.961571	0.943142	0.929748	0.942162	0.90104	0.865882	0.823162	0.760278	0.695502	0.579994
T (°C)	210	t (ks)	0	0.01	0.02	0.04	0.08	0.16	0.32	0.64	1.28	2.56	5.12	10.24
Ḋ (Gy/s)	0	Lx/Tx	0.953967	0.948749	0.937426	0.942754	0.934105	0.900327	0.845296	0.790054	0.695811	0.589317	0.480788	0.347606
T (°C)	230	t (ks)	0	0.01	0.02	0.04	0.08	0.16	0.32	0.64	1.28	2.56	5.12	10.24
Ḋ (Gy/s)	0	Lx/Tx	0.949704	0.938337	0.907919	0.915026	0.865772	0.808426	0.7223	0.60984	0.486899	0.358114	0.26314	0.162977
T (°C)	250	t (ks)	0	0.01	0.02	0.04	0.08	0.16	0.32	0.64	1.28	2.56	5.12	10.24
Ḋ (Gy/s)	0	Lx/Tx	0.937185	0.891507	0.869418	0.816773	0.736105	0.61583	0.503957	0.37718	0.260217	0.173394	0.105334	0.0556606
T (°C)	300	t (ks)	0	0.01	0.02	0.04	0.08	0.16	0.32	0.64	1.28	2.56	5.12	10.24
Ḋ (Gy/s)	0	Lx/Tx	0.683663	0.498892	0.430436	0.318647	0.219251	0.139649	0.0785454	0.0403612	0.0198906	0.00834168	0.003878	0.00175082
T (°C)	350	t (ks)	0	0.01	0.02	0.04	0.08	0.16	0.32	0.64
Ḋ (Gy/s)	0	Lx/Tx	0.22674	0.108569	0.0720254	0.0399321	0.0213492	0.00898388	0.00348633	0.00132686
T (°C)	15	t (ks)	1.204	13.052	19.074	31.111	55.185	1.203
Ḋ (Gy/s)	0	Lx/Tx	0.988889	0.877651	0.887416	0.867158	0.82223	0.991951
T (°C)	15	t (ks)	1.203	14.555	20.578	32.618	56.695	1.203
Ḋ (Gy/s)	0	Lx/Tx	0.972909	0.889268	0.889179	0.8472	0.799009	0.983267
T (°C)	15	t (ks)	1.204	16.056	22.084	34.126	58.203	1.204
Ḋ (Gy/s)	0	Lx/Tx	0.991018	0.877946	0.877047	0.86482	0.810366	1.00025

## Sheet: KRG01 IR100
Sample KRG01
Natural T (°C)
Natural Ḋ (Gy/ka)			6.176	1.048		Zhe	0.4	0.12		ZFT	0.74	0.27
Lab calibration:
T (°C)	15	t (ks)	Nat	0	0.25	0.5	1.5	3	6	12	24	48	0	0.25
Ḋ (Gy/s)	0.105	Lx/Tx	0.894731	0.00130224	0.293955	0.55574	1.29868	2.05528	3.11362	4.26227	5.08027	5.71441	0.0126691	0.301864
T (°C)	15	t (ks)	Nat	0	0.25	0.5	1.5	3	6	12	24	48	0	0.25
Ḋ (Gy/s)	0.105	Lx/Tx	1.39882	0.00454888	0.285069	0.532186	1.33247	2.11374	3.12625	4.18219	4.95933	5.18282	0.0194793	0.284256
T (°C)	15	t (ks)	Nat	0	0.25	0.5	1.5	3	6	12	24	48	0	0.25
Ḋ (Gy/s)	0.105	Lx/Tx	1.16679	0.00411534	0.274528	0.505349	1.31918	2.12665	3.12279	4.15583	4.90838	5.2204	0.0139268	0.284627
T (°C)	170	t (ks)	0	0.01	0.02	0.04	0.08	0.16	0.32	0.64	1.28	2.56	5.12	10.24
Ḋ (Gy/s)	0	Lx/Tx	0.981137	0.956426	0.955234	0.972972	0.979121	0.959602	0.933845	0.918761	0.904383	0.881228	0.869647	0.846116
T (°C)	190	t (ks)	0	0.01	0.02	0.04	0.08	0.16	0.32	0.64	1.28	2.56	5.12	10.24
Ḋ (Gy/s)	0	Lx/Tx	0.962637	0.931222	0.942377	0.937617	0.929833	0.967638	0.917118	0.905087	0.861533	0.839713	0.824369	0.762903
T (°C)	210	t (ks)	0	0.01	0.02	0.04	0.08	0.16	0.32	0.64	1.28	2.56	5.12	10.24
Ḋ (Gy/s)	0	Lx/Tx	0.991435	0.94212	0.952798	0.941625	0.931173	0.961435	0.891631	0.854762	0.815163	0.748811	0.722089	0.59753
T (°C)	230	t (ks)	0	0.01	0.02	0.04	0.08	0.16	0.32	0.64	1.28	2.56	5.12	10.24
Ḋ (Gy/s)	0	Lx/Tx	0.939205	0.961295	0.940421	0.959045	0.896339	0.887197	0.842784	0.809029	0.708122	0.617455	0.524562	0.380156
T (°C)	250	t (ks)	0	0.01	0.02	0.04	0.08	0.16	0.32	0.64	1.28	2.56	5.12	10.24
Ḋ (Gy/s)	0	Lx/Tx	0.947204	0.937723	0.914449	0.921888	0.866891	0.80898	0.732671	0.638823	0.52194	0.410505	0.296179	0.205164
T (°C)	300	t (ks)	0	0.01	0.02	0.04	0.08	0.16	0.32	0.64	1.28	2.56	5.12	10.24
Ḋ (Gy/s)	0	Lx/Tx	0.833119	0.734317	0.692846	0.595283	0.500486	0.382616	0.265574	0.176161	0.11318	0.0624529	0.0400252	0.0178451
T (°C)	350	t (ks)	0	0.01	0.02	0.04	0.08	0.16	0.32	0.64
Ḋ (Gy/s)	0	Lx/Tx	0.524296	0.351285	0.26554	0.190582	0.127831	0.0751169	0.0389345	0.0154259
T (°C)	15	t (ks)	1.343	13.192	19.214	31.252	55.326	1.345
Ḋ (Gy/s)	0	Lx/Tx	0.974588	0.901003	0.954582	0.924545	0.896282	0.982206
T (°C)	15	t (ks)	1.343	14.695	20.719	32.758	56.836	1.345
Ḋ (Gy/s)	0	Lx/Tx	0.918696	0.941892	0.972728	0.916917	0.870819	0.970845
T (°C)	15	t (ks)	1.344	16.196	22.224	34.267	58.344	1.345
Ḋ (Gy/s)	0	Lx/Tx	0.98697	0.916111	0.907812	0.925214	0.868361	0.973039

## Sheet: KRG01 IR150
Sample KRG01
Natural T (°C)
Natural Ḋ (Gy/ka)			6.176	1.048		Zhe	0.4	0.12		ZFT	0.74	0.27
Lab calibration:
T (°C)	15	t (ks)	Nat	0	0.25	0.5	1.5	3	6	12	24	48	0	0.25
Ḋ (Gy/s)	0.105	Lx/Tx	1.066	0.0011262	0.28676	0.538114	1.27773	2.09756	3.22083	4.49349	5.47789	6.17597	0.0110648	0.279098
T (°C)	15	t (ks)	Nat	0	0.25	0.5	1.5	3	6	12	24	48	0	0.25
Ḋ (Gy/s)	0.105	Lx/Tx	1.50956	0.00800158	0.273822	0.520744	1.29693	2.18227	3.24774	4.28495	5.22411	5.60009	0.0256898	0.286162
T (°C)	15	t (ks)	Nat	0	0.25	0.5	1.5	3	6	12	24	48	0	0.25
Ḋ (Gy/s)	0.105	Lx/Tx	1.38992	0.00595757	0.271499	0.506284	1.29848	2.16233	3.19358	4.31423	5.32439	5.76706	0.0192786	0.280661
T (°C)	170	t (ks)	0	0.01	0.02	0.04	0.08	0.16	0.32	0.64	1.28	2.56	5.12	10.24
Ḋ (Gy/s)	0	Lx/Tx	0.958492	0.977705	0.949811	0.959333	0.915074	0.961844	0.933225	0.923332	0.919699	0.911379	0.89011	0.849776
T (°C)	190	t (ks)	0	0.01	0.02	0.04	0.08	0.16	0.32	0.64	1.28	2.56	5.12	10.24
Ḋ (Gy/s)	0	Lx/Tx	0.956211	0.944751	0.940265	0.952373	0.977145	0.954621	0.924554	0.943313	0.929952	0.90346	0.86181	0.84149
T (°C)	210	t (ks)	0	0.01	0.02	0.04	0.08	0.16	0.32	0.64	1.28	2.56	5.12	10.24
Ḋ (Gy/s)	0	Lx/Tx	0.968804	0.951858	0.938945	0.968835	0.929607	0.953931	0.940484	0.902018	0.873313	0.855359	0.7846	0.676776
T (°C)	230	t (ks)	0	0.01	0.02	0.04	0.08	0.16	0.32	0.64	1.28	2.56	5.12	10.24
Ḋ (Gy/s)	0	Lx/Tx	0.973449	0.933439	0.925874	0.999947	0.91505	0.937944	0.886852	0.844485	0.806861	0.718437	0.638082	0.549879
T (°C)	250	t (ks)	0	0.01	0.02	0.04	0.08	0.16	0.32	0.64	1.28	2.56	5.12	10.24
Ḋ (Gy/s)	0	Lx/Tx	0.937742	0.918451	0.941898	0.911253	0.922326	0.874085	0.822547	0.742804	0.65454	0.562261	0.458869	0.329849
T (°C)	300	t (ks)	0	0.01	0.02	0.04	0.08	0.16	0.32	0.64	1.28	2.56	5.12	10.24
Ḋ (Gy/s)	0	Lx/Tx	0.846392	0.822261	0.829326	0.704526	0.66211	0.532905	0.428004	0.305188	0.227532	0.14016	0.0782474	0.0408856
T (°C)	350	t (ks)	0	0.01	0.02	0.04	0.08	0.16	0.32	0.64
Ḋ (Gy/s)	0	Lx/Tx	0.6384	0.501526	0.423878	0.3373	0.247704	0.16367	0.101671	0.0481134
T (°C)	15	t (ks)	1.505	13.354	19.376	31.414	55.488	1.508
Ḋ (Gy/s)	0	Lx/Tx	0.948153	0.905728	0.935189	0.923529	0.883317	0.979376
T (°C)	15	t (ks)	1.504	14.857	20.881	32.921	56.999	1.508
Ḋ (Gy/s)	0	Lx/Tx	0.941638	0.91979	0.953892	0.930849	0.878192	0.937264
T (°C)	15	t (ks)	1.505	16.357	22.387	34.43	58.507	1.509
Ḋ (Gy/s)	0	Lx/Tx	0.952997	0.926125	0.913588	0.923171	0.896441	0.996658

## Sheet: KRG01 IR225
Sample KRG01
Natural T (°C)
Natural Ḋ (Gy/ka)			6.176	1.048		Zhe	0.4	0.12		ZFT	0.74	0.27
Lab calibration:
T (°C)	15	t (ks)	Nat	0	0.25	0.5	1.5	3	6	12	24	48	0	0.25
Ḋ (Gy/s)	0.105	Lx/Tx	1.15444	0.00411573	0.282593	0.518268	1.19557	1.95058	2.87819	3.90531	4.65315	5.08681	0.0159441	0.275594
T (°C)	15	t (ks)	Nat	0	0.25	0.5	1.5	3	6	12	24	48	0	0.25
Ḋ (Gy/s)	0.105	Lx/Tx	1.77763	0.00648461	0.280565	0.518886	1.2186	1.92829	3.00901	3.94862	4.62318	5.29359	0.0201637	0.28925
T (°C)	15	t (ks)	Nat	0	0.25	0.5	1.5	3	6	12	24	48	0	0.25
Ḋ (Gy/s)	0.105	Lx/Tx	1.41019	0.00755489	0.26377	0.493235	1.23784	1.98667	2.88917	3.77798	4.58977	4.97638	0.0216601	0.272533
T (°C)	170	t (ks)	0	0.01	0.02	0.04	0.08	0.16	0.32	0.64	1.28	2.56	5.12	10.24
Ḋ (Gy/s)	0	Lx/Tx	0.961047	0.931288	0.929525	0.909504	0.920002	0.915118	0.900989	0.896862	0.864542	0.845344	0.885844	0.845108
T (°C)	190	t (ks)	0	0.01	0.02	0.04	0.08	0.16	0.32	0.64	1.28	2.56	5.12	10.24
Ḋ (Gy/s)	0	Lx/Tx	0.928008	0.92225	0.931788	0.901885	0.916579	0.904088	0.881824	0.886395	0.871601	0.840772	0.849403	0.798492
T (°C)	210	t (ks)	0	0.01	0.02	0.04	0.08	0.16	0.32	0.64	1.28	2.56	5.12	10.24
Ḋ (Gy/s)	0	Lx/Tx	0.931688	0.926824	0.913807	0.931516	0.91069	0.915951	0.886377	0.85171	0.838281	0.782518	0.777462	0.704615
T (°C)	230	t (ks)	0	0.01	0.02	0.04	0.08	0.16	0.32	0.64	1.28	2.56	5.12	10.24
Ḋ (Gy/s)	0	Lx/Tx	0.906956	0.923678	0.883355	0.902131	0.875923	0.891052	0.868925	0.82026	0.799671	0.710367	0.670228	0.592425
T (°C)	250	t (ks)	0	0.01	0.02	0.04	0.08	0.16	0.32	0.64	1.28	2.56	5.12	10.24
Ḋ (Gy/s)	0	Lx/Tx	0.908413	0.891443	0.91132	0.869076	0.861693	0.805751	0.805927	0.730332	0.687468	0.608201	0.519805	0.459877
T (°C)	300	t (ks)	0	0.01	0.02	0.04	0.08	0.16	0.32	0.64	1.28	2.56	5.12	10.24
Ḋ (Gy/s)	0	Lx/Tx	0.828648	0.776744	0.755203	0.71733	0.671935	0.608789	0.514115	0.442532	0.355148	0.292065	0.221016	0.149325
T (°C)	350	t (ks)	0	0.01	0.02	0.04	0.08	0.16	0.32	0.64
Ḋ (Gy/s)	0	Lx/Tx	0.669152	0.579683	0.537504	0.470405	0.391503	0.3111	0.245564	0.157955
T (°C)	15	t (ks)	1.691	13.54	19.562	31.6	55.675	1.696
Ḋ (Gy/s)	0	Lx/Tx	0.921647	0.871886	0.917184	0.919057	0.870018	0.954204
T (°C)	15	t (ks)	1.69	15.043	21.068	33.108	57.186	1.696
Ḋ (Gy/s)	0	Lx/Tx	0.925968	0.901888	0.925131	0.907904	0.87434	0.919554
T (°C)	15	t (ks)	1.691	16.544	22.573	34.617	58.694	1.696
Ḋ (Gy/s)	0	Lx/Tx	0.925386	0.91298	0.903826	0.905655	0.866867	0.934062

## Sheet: KRG03 IR50
Sample KRG03
Natural T (°C)
Natural Ḋ (Gy/ka)			6.361	1.528		ZHe	0.26	0.15		ZFT	0.770813	0.347737
Lab calibration:
T (°C)	15	t (ks)	Nat.	0	0.25	0.5	1.5	3	6	12	24	48	0	0.25
Ḋ (Gy/s)	0.102577	Lx/Tx	0.46481	0.00065542	0.29685	0.55434	1.3045	2.0748	3.0173	4.0305	5.0309	5.8283	0.0064415	0.30098
T (°C)	15	t (ks)	Nat.	0	0.25	0.5	1.5	3	6	12	24	48	0	0.25
Ḋ (Gy/s)	0.102577	Lx/Tx	0.41361	0.0012669	0.27367	0.56081	1.3067	2.0791	3.0088	4.1098	5.1376	5.8651	0.0062191	0.3058
T (°C)	15	t (ks)	Nat.	0	0.25	0.5	1.5	3	6	12	24	48	0	0.25
Ḋ (Gy/s)	0.102577	Lx/Tx	0.40636	0.00090961	0.30171	0.54491	1.2993	2.029	3.0101	3.9435	4.8974	5.5025	0.0028872	0.30266
T (°C)	170	t (ks)	0	0.01	0.02	0.04	0.08	0.16	0.32	0.64	1.28	2.56	5.12	10.24
Ḋ (Gy/s)	0	Lx/Tx	0.97888	0.95716	0.95756	0.97059	0.94866	0.94129	0.92561	0.89495	0.87445	0.82416	0.77153	0.72351
T (°C)	190	t (ks)	0	0.01	0.02	0.04	0.08	0.16	0.32	0.64	1.28	2.56	5.12	10.24
Ḋ (Gy/s)	0	Lx/Tx	0.96731	0.97324	0.95138	0.95793	0.94415	0.93448	0.90408	0.87021	0.82593	0.76203	0.68538	0.58716
T (°C)	210	t (ks)	0	0.01	0.02	0.04	0.08	0.16	0.32	0.64	1.28	2.56	5.12	10.24
Ḋ (Gy/s)	0	Lx/Tx	0.96125	0.95405	0.95432	0.94253	0.93035	0.91135	0.86363	0.79841	0.71173	0.62011	0.49544	0.37549
T (°C)	230	t (ks)	0	0.01	0.02	0.04	0.08	0.16	0.32	0.64	1.28	2.56	5.12	10.24
Ḋ (Gy/s)	0	Lx/Tx	0.9597	0.93255	0.93057	0.92176	0.88415	0.82942	0.74008	0.64013	0.51728	0.39842	0.28561	0.18241
T (°C)	250	t (ks)	0	0.01	0.02	0.04	0.08	0.16	0.32	0.64	1.28	2.56	5.12	10.24
Ḋ (Gy/s)	0	Lx/Tx	0.93846	0.91916	0.88814	0.84747	0.77132	0.6751	0.5544	0.41953	0.29629	0.19373	0.11904	0.061509
T (°C)	300	t (ks)	0	0.01	0.02	0.04	0.08	0.16	0.32	0.64	1.28	2.56	5.12	10.24
Ḋ (Gy/s)	0	Lx/Tx	0.75966	0.58704	0.48791	0.37285	0.25923	0.1641	0.089624	0.040818	0.019761	0.0071882	0.0028528	0.0007837
T (°C)	350	t (ks)	0	0.01	0.02	0.04	0.08	0.16	0.32	0.64
Ḋ (Gy/s)	0	Lx/Tx	0.2806	0.13003	0.081821	0.042283	0.01872	0.0076504	0.0017929	-0.0012078
T (°C)	15	t (ks)	0.703	9.046	15.064	27.101	51.173	0.703
Ḋ (Gy/s)	0	Lx/Tx	0.96596	0.87757	0.85487	0.8359	0.80673	0.96014
T (°C)	15	t (ks)	0.703	10.543	16.561	28.597	52.671	0.703
Ḋ (Gy/s)	0	Lx/Tx	0.98183	0.86472	0.83861	0.82214	0.80389	0.97752
T (°C)	15	t (ks)	0.704	12.039	18.061	30.092	54.17	0.703
Ḋ (Gy/s)	0	Lx/Tx	0.97195	0.86606	0.8544	0.82215	0.81302	0.97183

[truncated: 63 more sheets: KRG03 IR100, KRG03 IR150, KRG03 IR225, KRG05 IR50, KRG05 IR100, KRG05 IR150, KRG05 IR225, KRG06 IR50, KRG06 IR100, KRG06 IR150, KRG06 IR225, KRG07 IR50, KRG07 IR100, KRG07 IR150, KRG07 IR225, KRG08 IR50, KRG08 IR100, KRG08 IR150, KRG08 IR225, KRG10 IR50 …]
